# Supplementary material for: Study on risk factors of diabetic peripheral neuropathy and development of a prediction model based on machine learning
Source: Research Square preprint supplement (doi:10.21203/rs.3.rs-3715875/v1), 2023-12-12
Supplement: Supplementary file 1 [file 90120e673abbd057906f31d0.docx]

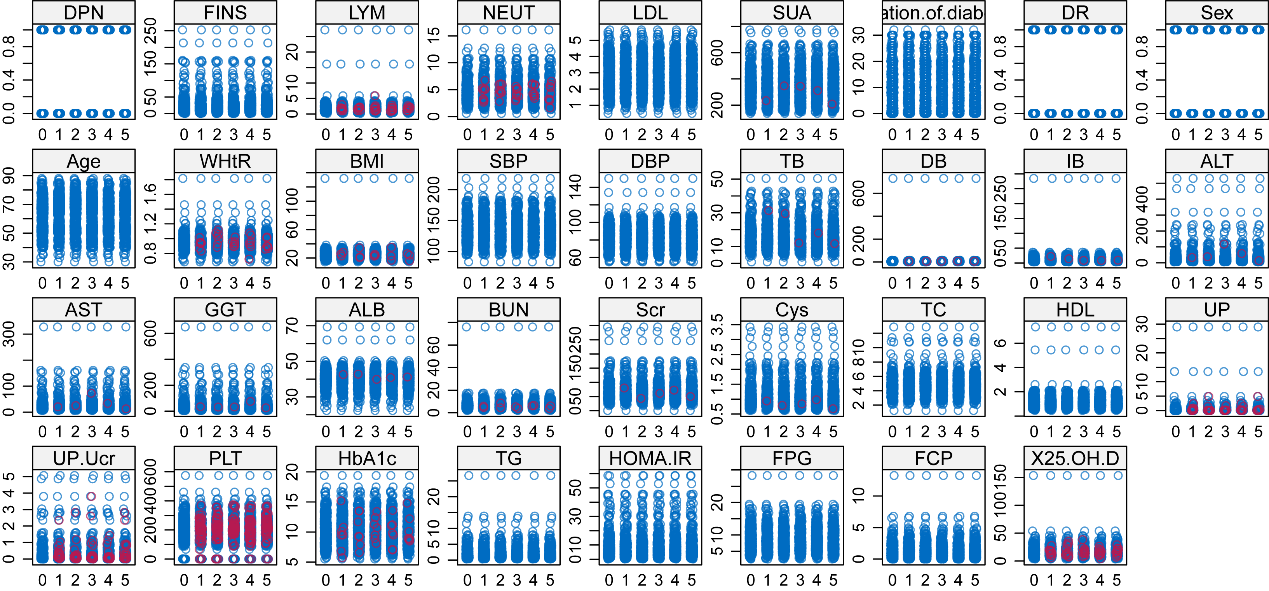


Supplementary Figure 1. We evaluated data completeness and addressed missing information. Importantly, for subjects with less than 30% missing data, we performed data interpolation. This figure illustrates the results of data interpolation. The density of the data distribution before and after interpolation of our study was essentially the same.
